# Supplementary material for: Mineral Solubilizing Rhizobacterial Strains Mediated Biostimulation of Rhodes Grass Seedlings
Source: MDPI journal article supplement (doi:10.3390/microorganisms11102543), 2023-10-12
Supplement: s1 [file s1]

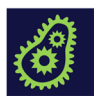

## Article

# Mineral Solubilizing Rhizobacterial Strains Mediated Biostimulation of Rhodes Grass Seedlings

Saira Mushtaq <sup>1</sup>, Maha Afzal <sup>1</sup>, Uzma Mushtaq <sup>1</sup>, Muhammad Zahid Mumtaz <sup>1,\*</sup>, Ghulam Rasool <sup>1</sup>, Hayssam M. Ali <sup>2</sup>, Tahir Naqqash <sup>3</sup>, Muhammad Fakhar-U-Zaman Akhtar <sup>4</sup>, Ghulam Abbas <sup>5</sup>, Lingling Li <sup>6,7</sup>, and Shaista Javaid <sup>1,\*</sup>

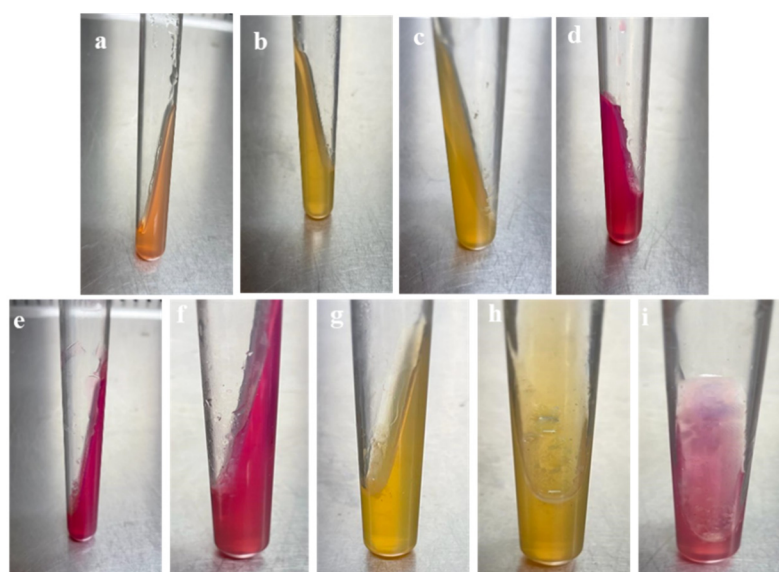

**Figure S1:** Urease activity of rhizobacterial strains (from left to right: (a) control; (b) SM5; (c) SM2; (d) SM7; (e) SM4; (f) MS2; (g) MS1; (h) MS4; (i) MS7).

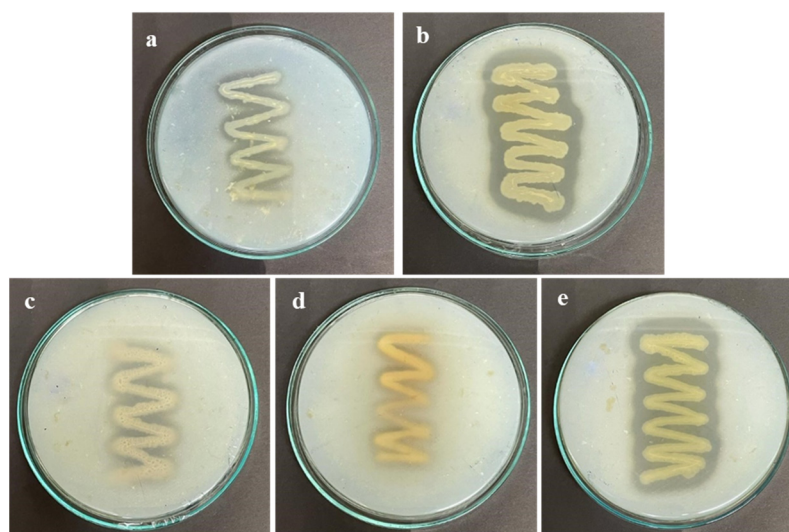

**Figure S2.** Protease activity of rhizobacterial strains [(a) SM2; (b) SM5; (c) MS4; (d) MS7; (e) MS1].

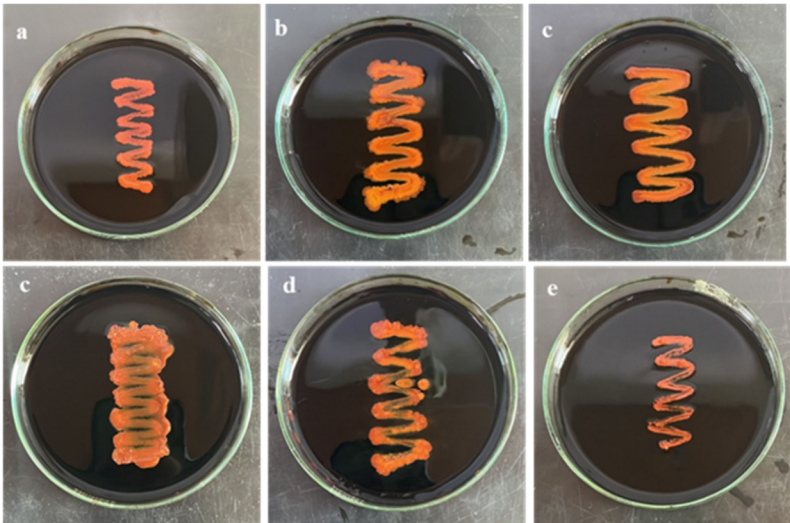

**Figure S3.** Amylase activity of rhizobacterial bacteria [(a) SM2; (b) SM5; (c) SM7; (d) MS1; (e) MS4; (f) MS7].

**Table S1.** The results of the triple sugar iron test of rhizobacterial strains from Rhodes grass rhizosphere

| Strains | Slant/Butt                   | Interpretation                                            | Symbol              |
|---------|------------------------------|-----------------------------------------------------------|---------------------|
| SM2     | Red Slant/<br>Yellow Butt    | Only glucose fermentation;<br>Peptone catabolized         | K/A                 |
| SM4     | Yellow Slant/<br>Yellow Butt | Glucose <del>and</del> lactose<br>or sucrose fermentation | A/A                 |
| SM5     | Yellow Slant/<br>Black Butt  | H <sub>2</sub> S produced                                 | A/ H <sub>2</sub> S |
| SM7     | Red Slant/<br>Yellow Butt    | Only glucose fermentation;<br>Peptone catabolized         | K/A                 |
| MS1     | Yellow Slant/<br>Yellow Butt | Glucose <del>and</del> lactose<br>or sucrose fermentation | A/A                 |
| MS2     | Red Slant/<br>Yellow Butt    | Only glucose fermentation;<br>Peptone catabolized         | K/A                 |
| MS4     | Yellow Slant/<br>Yellow Butt | Glucose <del>and</del> lactose<br>or sucrose fermentation | A/A                 |
| MS7     | Yellow Slant/<br>Yellow Butt | Glucose, sucrose fermentation<br><del>and</del> lactose   | A/A                 |

K: Alkaline reaction; A: Acid production; H<sub>2</sub>S: Sulfur reduction

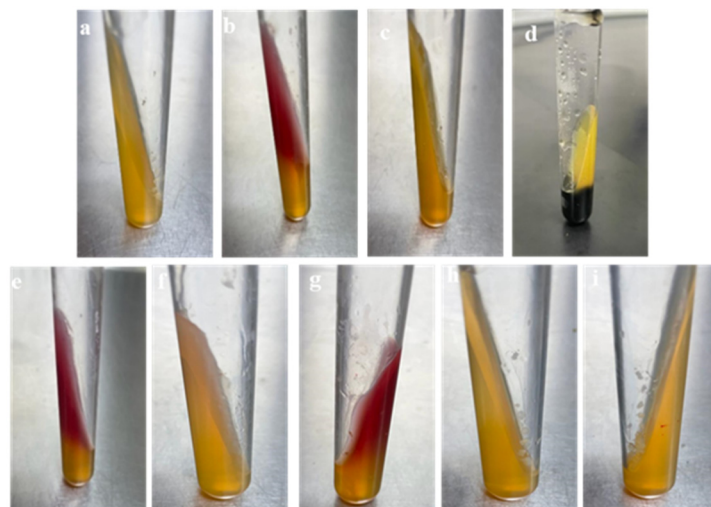

**Figure S4.** View of triple sugar iron due to inoculation with rhizobacterial strains [(a) Control; (b) SM2; (c) SM4; (d) SM5; (e) SM7; (f) MS7; (g) MS2; (h) MS1; (i) MS4].

### Triple sugar iron test

This test was used to evaluate the ability of rhizobacterial strains to produce hydrogen sulfide (H<sub>2</sub>S) and ferment sugars such as glucose, sucrose, and lactose. Results revealed that all the rhizobacterial strains ~~variation~~varied to ferment sugar (Table S1 and Figure S4). The butt color indicates the fermentation of glucose. In contrast, the slant color indicates sucrose and lactose fermentation. H<sub>2</sub>S gas production results in the blackening of the medium.

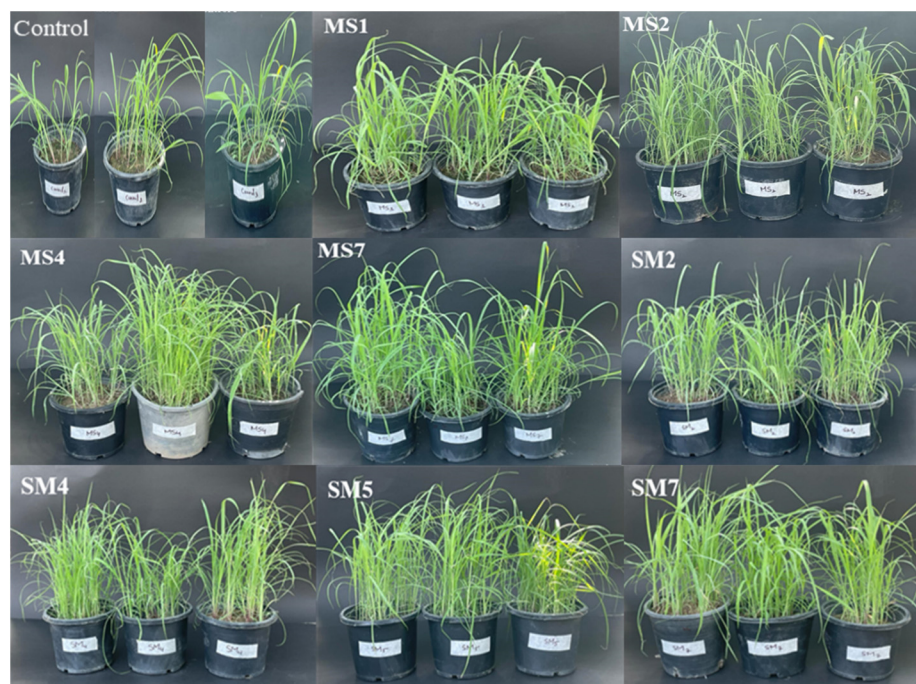

**Figure S5.** Pictorial view of a pot experiment conducted to evaluate the effect of various bacterial strains on seedlings of Rhodes grass.
